# Supplementary material
Source: PubMed Central journal article supplement (PMC10727729)
Supplement: NIHPP2021.01.17.426875V4-supplement-1.pdf [file NIHPP2021.01.17.426875V4-supplement-1.pdf]

486 Supplemental Figures

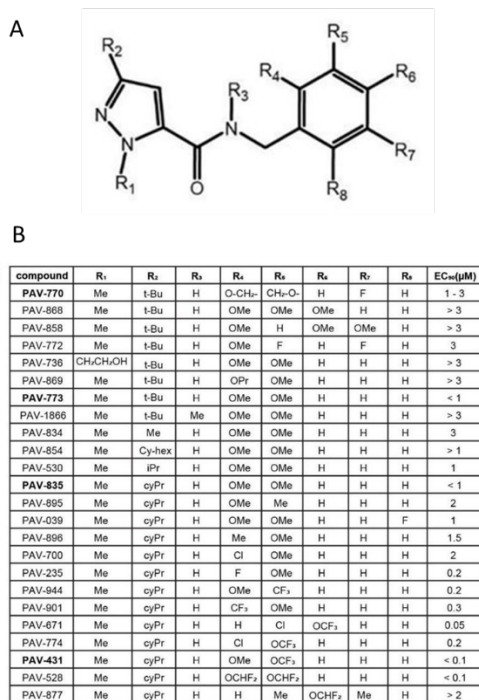

487

488 **Supplemental Figure 1. Early SAR exploration within hit chemical series. Supplemental Figure 1A shows**

489 a Markush structure for the initial hit chemical series in the CFPSA flu capsid assembly screen.

490 **Supplemental Figure 1B shows the initial structure-activity-relationship pursued to characterize how**

491 changes to different parts of the molecule affect activity of the series. EC<sub>50</sub> for each compound was

492 determined by TCID<sub>50</sub> with infectious FLUV in MDCK cells.

493

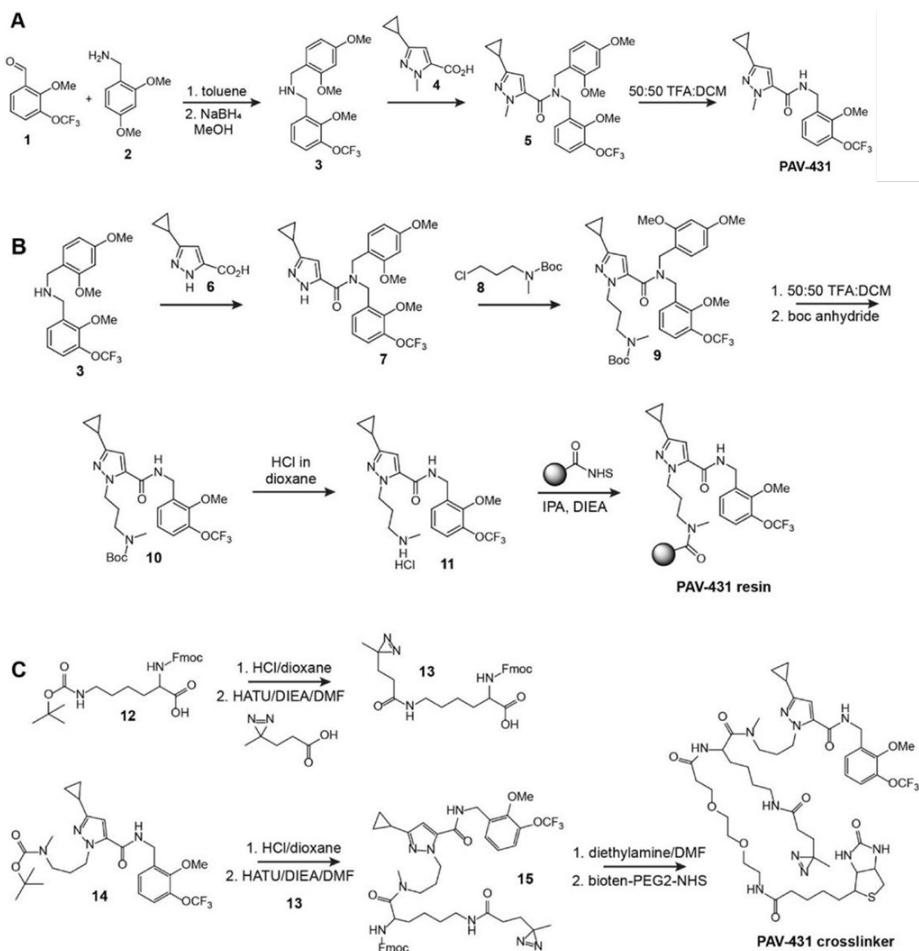

494

495

**Supplemental Figure 2. Synthetic scheme for PAV-431 and its resin and photocrosslinker analogs.**

496

**Supplemental Figure 2A** shows the synthetic scheme for PAV-431. **Supplemental Figure 2B** shows the

497

synthetic scheme for attachment to a resin by the pyrazole position, which was used in the eDRAC

498

experiments described in Figure 5 and Supplemental Figure 4. The eDRAC experiments described in Figure

499

6 were conducted with a resin attached from the benzyl ring. **Supplemental Figure 2C** shows the synthetic

500

scheme for the PAV-431 photocrosslinker analog used in the experiments described in Figure 6.

**A**

| Compounds Parameters  |                                   | PAV-431 |          |           |
|-----------------------|-----------------------------------|---------|----------|-----------|
| EC <sub>50</sub> (nM) |                                   | 100     |          |           |
| MW                    |                                   | 369.3   |          |           |
| Mouse MTD             | Route- Dosage, mg/kg<br>Safe dose | -       | IP-5     | -         |
| Rat PK                | Route- Dosage, mg/kg              | IV-1    | IP-5     | PO-5      |
|                       | AUC <sub>0-24h</sub> , h.ng/mL    | 307     | 910      | Low conc. |
|                       | AUC <sub>0-8h</sub> , h.ng/mL     | 342     | 923      |           |
|                       | C <sub>max</sub> , ng/mL          | 253     | 293      |           |
|                       | T <sub>max</sub> , h              | 0.08    | 0.25     |           |
|                       | t <sub>1/2</sub> , h              | 12      | 5        |           |
|                       | CL, mL/min                        | 49      | -        |           |
|                       | V <sub>d</sub> , L/Kg             | 32      | -        |           |
| F, %                  | -                                 | 59      | -        |           |
| Rat Uptake            | Route- Dosage, mg/kg              | -       | IP-5     | -         |
|                       | Conc. In Lungs, ng/g, 0.5h, 2h    | -       | 452, 131 | -         |
|                       | Conc. in Brain, ng/g, 0.5h, 2h    | -       | 593, 177 | -         |
|                       | Conc. in Plasma, ng/mL, 0.5h, 2h  | -       | 308, 123 | -         |

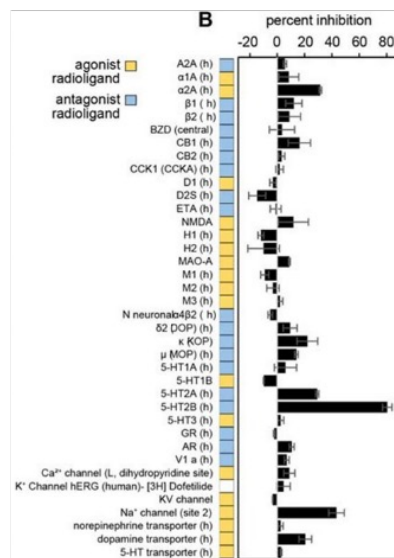

501

502 **Supplemental Figure 3. Supplemental Figure 3A** shows the drug-like properties of PAV-431 including in

503 vivo and in vitro assessments of toxicity as well as pharmacokinetic properties. Maximum tolerated dose

504 (MTD) studies in mice were conducted using female Balb/c mice where randomized groups containing 3

505 mice were dosed with a single dose of vehicle or compound and monitored for 48 hours for symptoms of

506 toxicity. Pharmacokinetic (PK) studies were conducted in male Sprague Dawley rats where randomized

507 groups of four animals were administered compound and plasma was collected before dosing then after 5

508 minutes, 15 minutes, 30 minutes, 1 hour, 2 hours, 4 hours, 8 hours, 12 hours, and 24 hours to determine

509 concentration of the compound in plasma over time. In the uptake studies, animals were euthanized after

510 30 minutes or 2 hours to determine concentration of the compound in the lung and brain. **Supplemental**

511 **Figure 3B** shows the results of PAV-431 in an in vitro Cerep panel, a commercial screen for potential to

512 bind to a broad panel of receptors, enzymes, and ion channels, reported as percent inhibition of control

513 specific binding. PAV-431 was tested at 50uM, a concentration ~500x higher than antiviral EC50. Data

514 shown are the averages of replicates, error bars indicate standard error.

515

516
